# Supplementary material
Source: Springer Nature journal article supplement (https://www.springermedizin.de/resource/supplementary/13058_2009_2536_MOESM8_ESM.pdf/9701642)

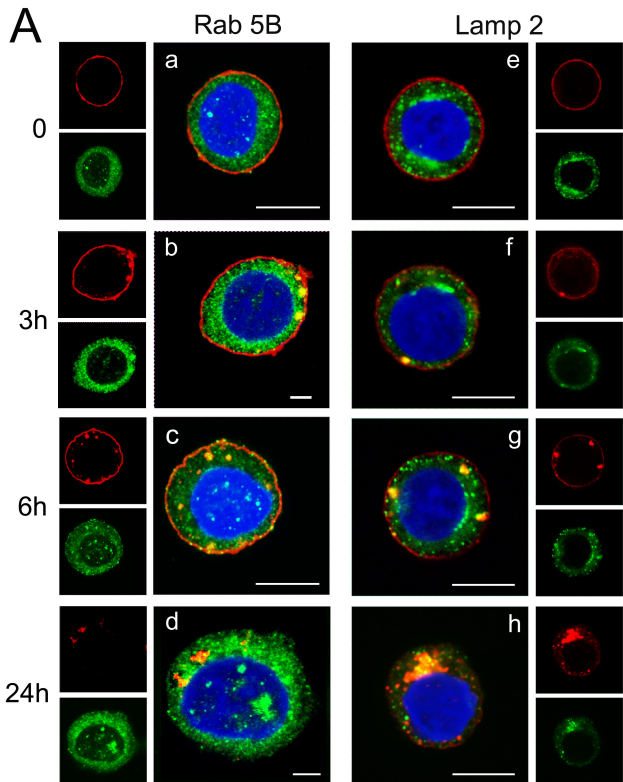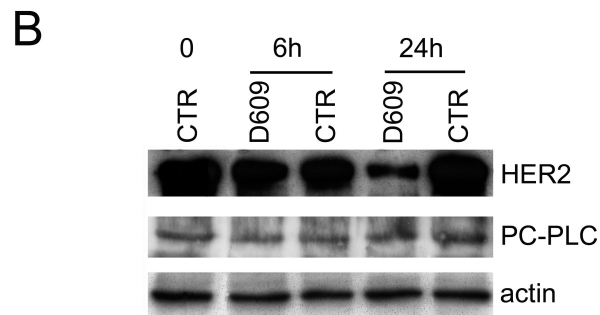

Supplement: MOESM8 [file 9701642]
